# Supplementary material for: Structural stability and intriguing electronic properties of two-dimensional transition metal dichalcogenide alloys
Source: Royal Society of Chemistry journal article supplement (doi:10.1039/c7cp01727h), 2017-01-01
Supplement: c7cp01727h1.pdf [file c7cp01727h1.pdf]

## Supplementary Information for Structural Stability and Intriguing Electronic Properties of Two- dimensional Transition Metal Dichalcogenides Alloys

Xiao Yuan, Lu Wang\* and Youyong Li\*

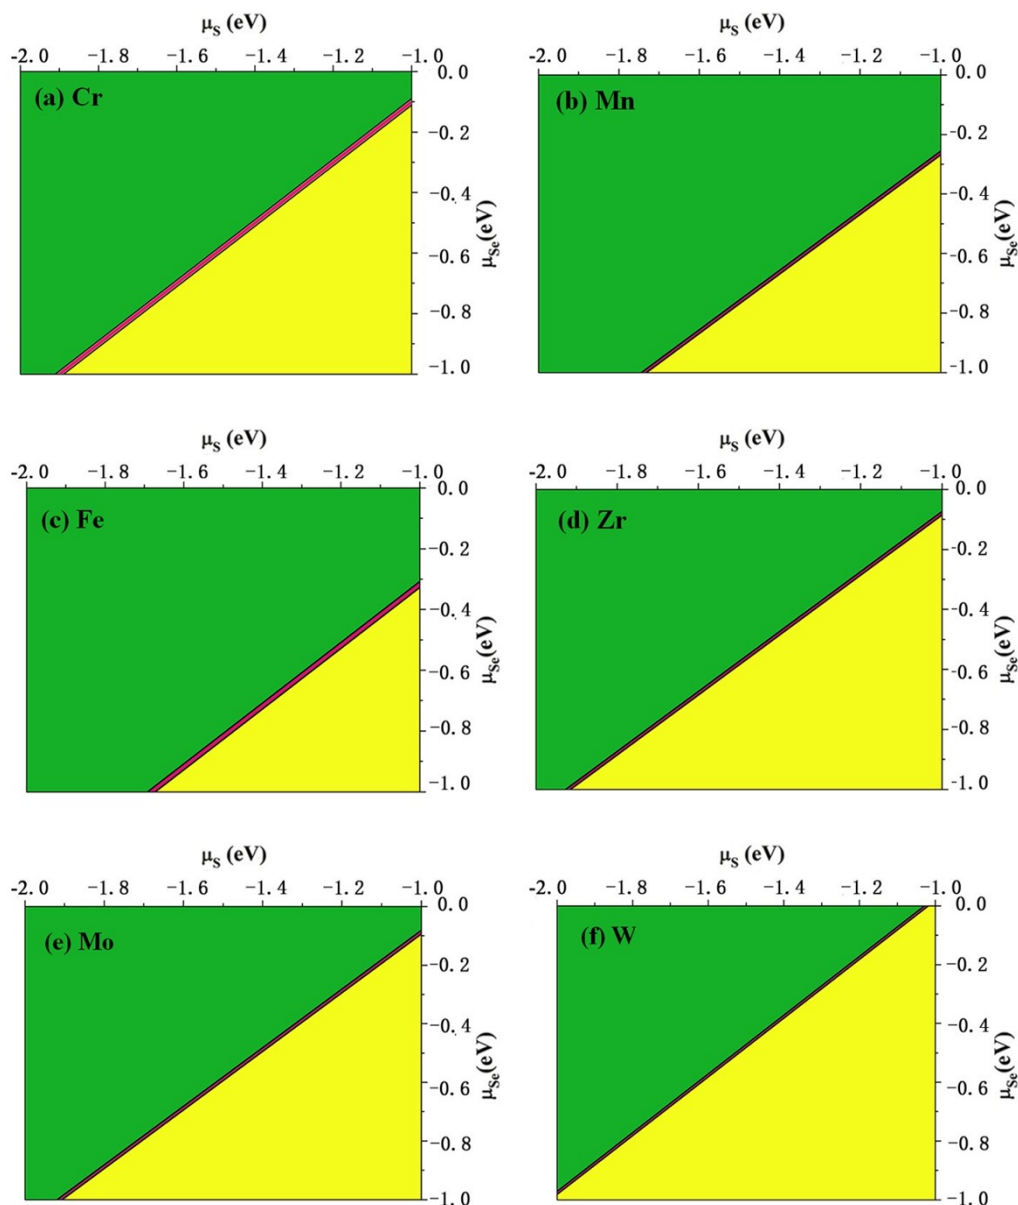

**Fig.S1.** Phase diagrams of transition metal dichalcogenides(Cr, Mn, Fe, Zr, Mn, W). The yellow region and green region indicate the single phases of  $MS_2$  and  $MSe_2$ , respectively, and the red region represents the mixed phases of  $MSSe$  alloy.

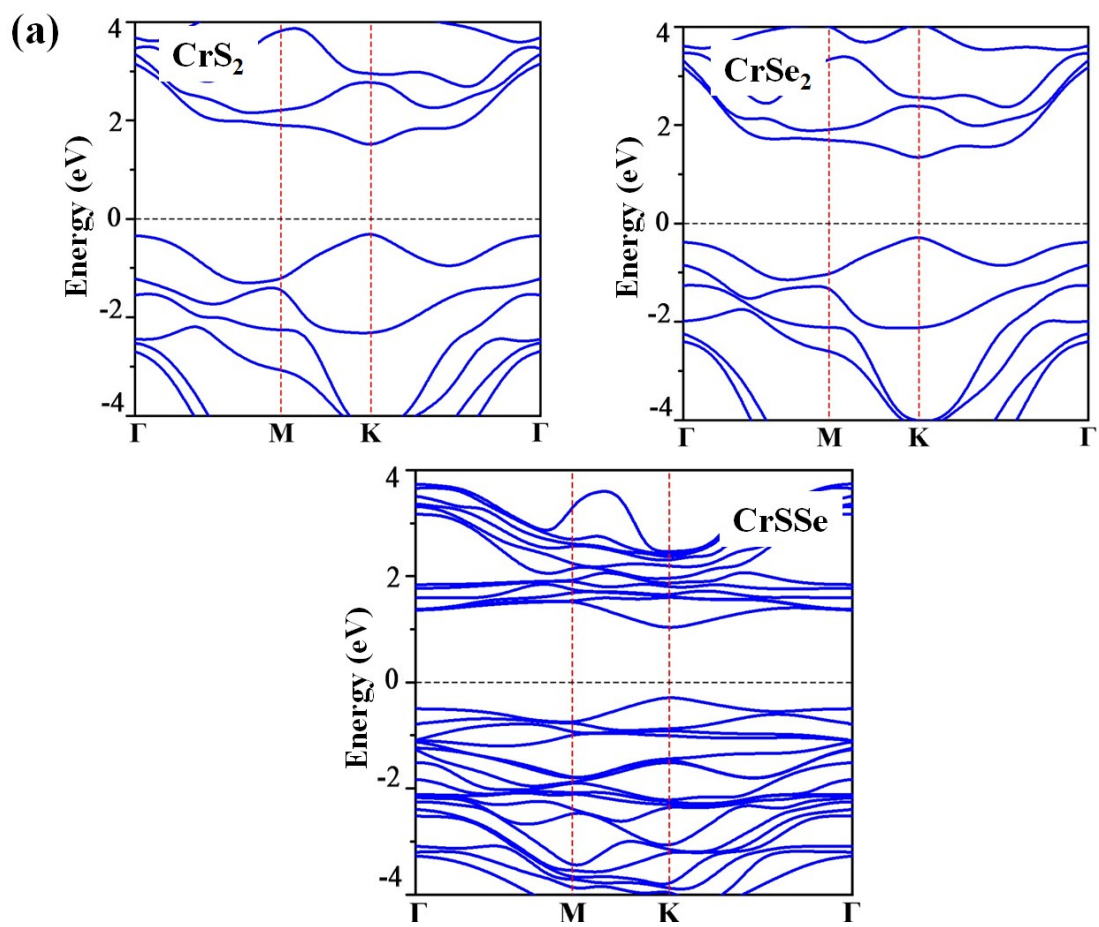

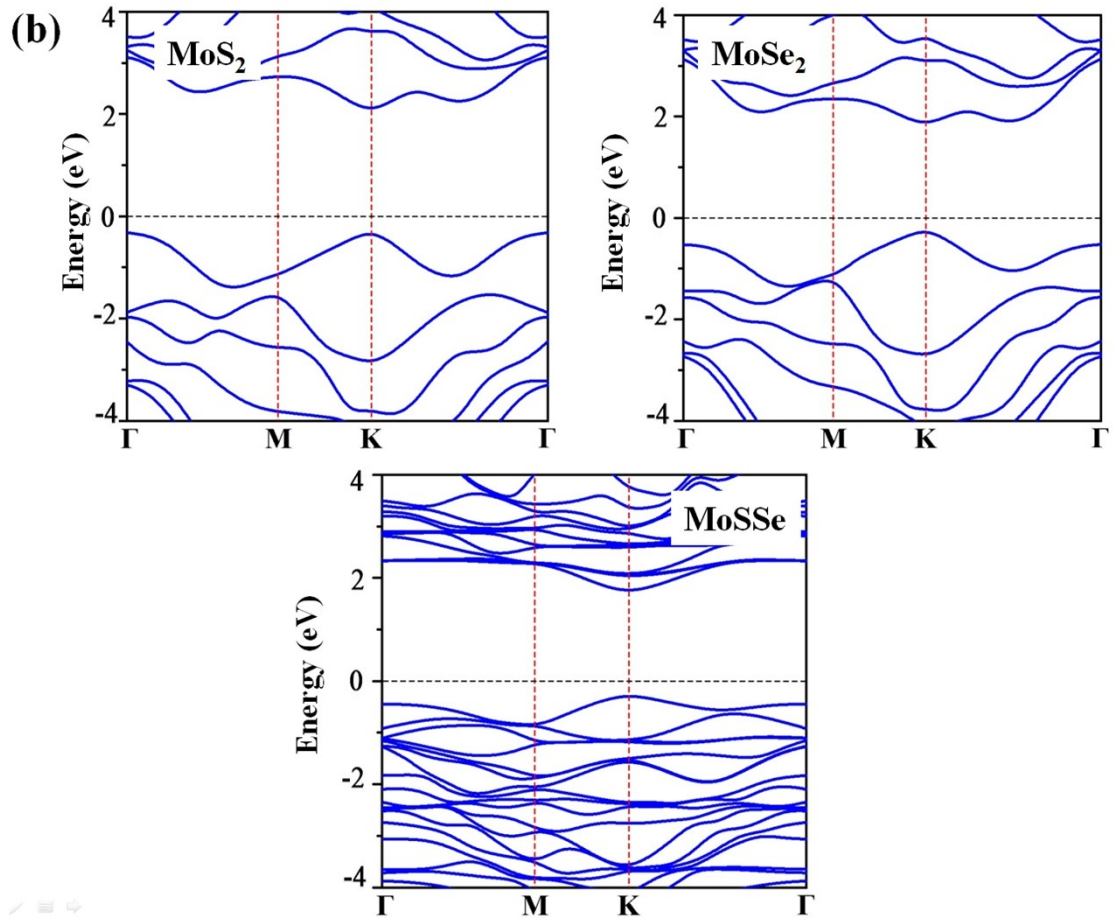

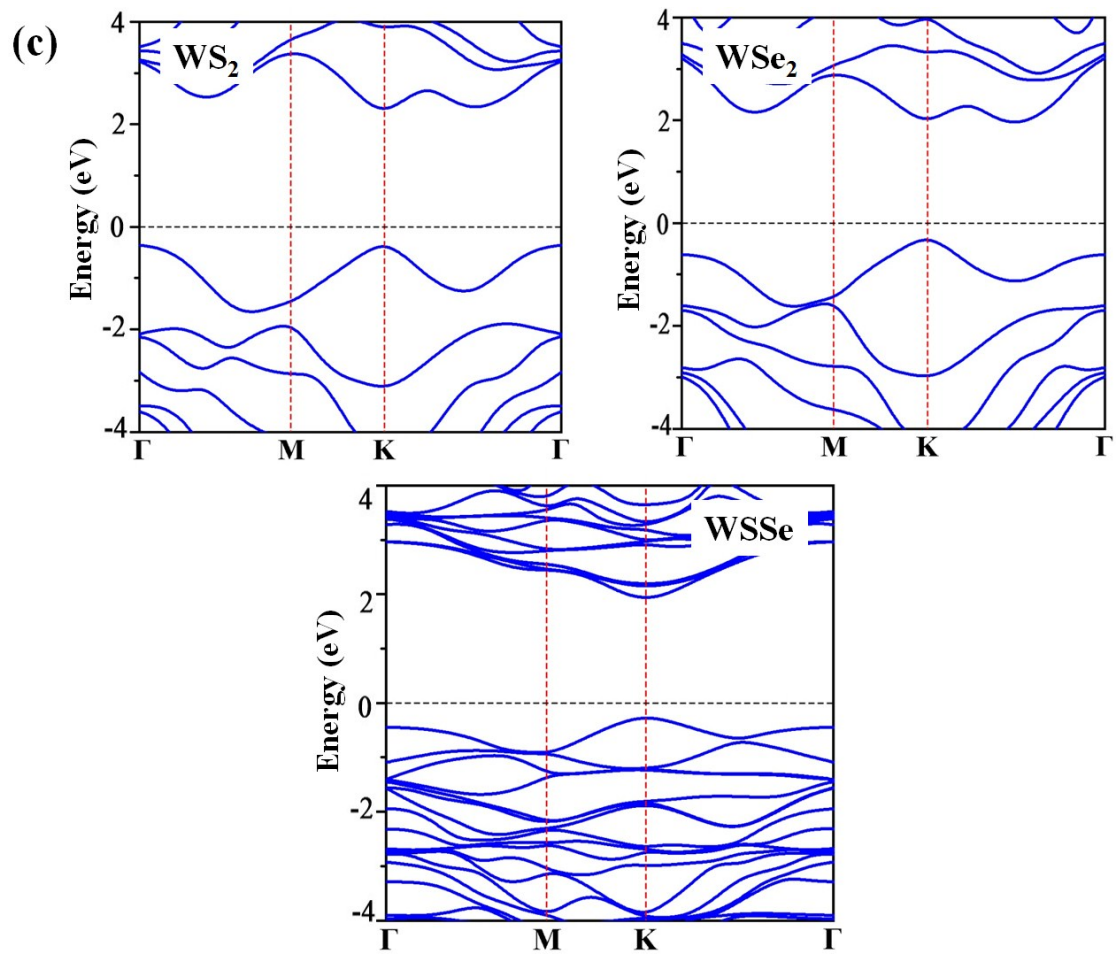

**Fig. S2.** Band structures of single phases and mixed phases of transition metal dichalcogenides  $MX_2$  with (a)  $M=Cr$ , (b)  $M=Mo$  and (c)  $M=W$ .

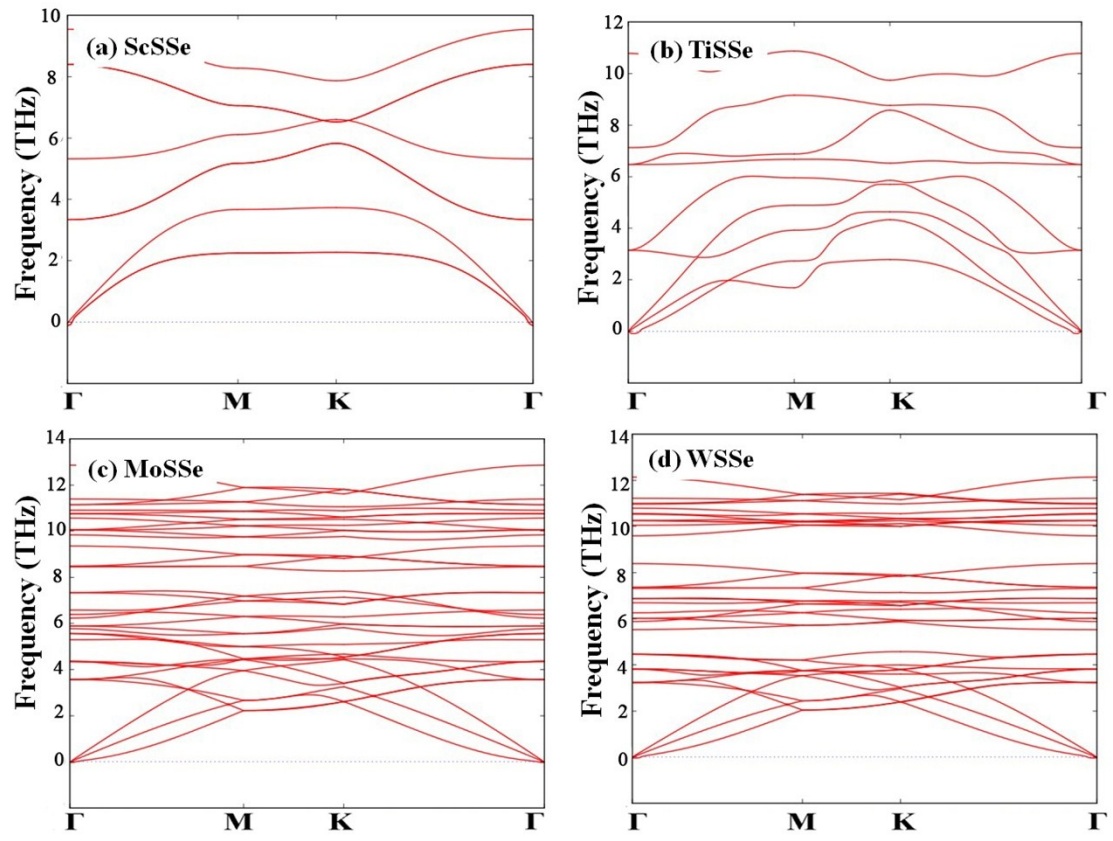

Fig S3. Phonon spectra of mixed phases with the wave vector from  $\Gamma$ , M, K to  $\Gamma$ .

**Table S1.** Parameter lattices (Å) and bond lengths (Å) for the single phases and mixed phases of transition metal dichalcogenides.

|                   | structure | lattice | d(M-S)       | d(M-Se)      | d(S-S) | d(Se-Se) | d(S-Se) |
|-------------------|-----------|---------|--------------|--------------|--------|----------|---------|
| ScS <sub>2</sub>  | 1T        | 3.719   | 2.545        |              | 3.475  |          |         |
| ScSe <sub>2</sub> | 1T        | 3.610   |              | 2.689        |        | 3.985    |         |
| ScSSe heterolayer | 1T        | 3.560   | 2.463        | 2.828        |        |          | 3.888   |
| ScSSe alternating | 1T        | 7.120   | 2.505(2.529) | 2.710(2.755) |        |          |         |
|                   |           |         |              |              |        |          |         |
| TiS <sub>2</sub>  | 1T        | 3.398   | 2.426        |              | 3.462  |          |         |
| TiSe <sub>2</sub> | 1T        | 3.528   |              | 2.560        |        | 3.712    |         |
| TiSSe heterolayer | 1T        | 3.467   | 2.409        | 2.579        |        |          | 3.580   |
| TiSSe alternating | 1T        | 6.934   | 2.408(2.427) | 2.562(2.580) |        |          |         |
|                   |           |         |              |              |        |          |         |
| VS <sub>2</sub>   | 2H        | 3.174   | 2.362        |              | 2.982  |          |         |
| VSe <sub>2</sub>  | 1T        | 3.342   |              | 2.490        |        | 3.693    |         |
| VSSe heterolayer  | 1T        | 3.269   | 2.345        | 2.502        |        |          | 3.573   |
| VSSe alternating  | 1T        | 6.538   | 2.327(2.345) | 2.498(2.525) |        |          |         |
|                   |           |         |              |              |        |          |         |
| CrS <sub>2</sub>  | 2H        | 3.041   | 2.289        |              | 2.938  |          |         |
| CrSe <sub>2</sub> | 2H        | 3.209   |              | 2.429        |        | 3.141    |         |
| CrSSe heterolayer | 2H        | 3.125   | 2.300        | 2.421        |        |          | 3.041   |
| CrSSe alternating | 2H        | 6.250   | 2.290(2.291) | 2.429(2.431) |        |          |         |
| CrSSe separating  | 2H        | 6.250   | 2.285(2.301) | 2.420(2.432) | 2.911  | 3.171    |         |
|                   |           |         |              |              |        |          |         |
| MnS <sub>2</sub>  | 1T        | 3.346   | 2.377        |              | 3.264  |          |         |
| MnSe <sub>2</sub> | 1T        | 3.502   |              | 2.474        |        | 3.497    |         |
| MnSSe heterolayer | 1T        | 3.408   | 2.334        | 2.474        |        |          | 3.385   |
| MnSSe alternating | 1T        | 6.816   | 2.328(2.332) | 2.475(2.479) |        |          |         |
|                   |           |         |              |              |        |          |         |
| FeS <sub>2</sub>  | 2H        | 3.151   | 2.267        |              | 2.707  |          |         |
| FeSe <sub>2</sub> | 2H        | 3.272   |              | 2.429        |        | 3.053    |         |

|                   |    |       |              |              |       |       |       |
|-------------------|----|-------|--------------|--------------|-------|-------|-------|
| FeSSe heterolayer | 2H | 3.218 | 2.254        | 2.424        |       |       | 2.833 |
| FeSSe alternating | 2H | 6.436 | 2.263        | 2.406(2.414) |       |       |       |
|                   |    |       |              |              |       |       |       |
| NiS <sub>2</sub>  | 1T | 3.349 | 2.258        |              | 3.028 |       |       |
| NiSe <sub>2</sub> | 1T | 3.541 |              | 2.390        |       | 3.211 |       |
| NiSSe heterolayer | 1T | 3.445 | 2.284        | 2.368        |       |       | 3.122 |
| NiSSe alternating | 1T | 6.890 | 2.271(2.258) | 2.382(2.391) |       |       |       |
|                   |    |       |              |              |       |       |       |
| ZrS <sub>2</sub>  | 1T | 3.684 | 2.574        |              | 3.596 |       |       |
| ZrSe <sub>2</sub> | 1T | 3.800 |              | 2.706        |       | 3.852 |       |
| ZrSSe heterolayer | 1T | 3.742 | 2.568        | 2.713        |       |       | 3.721 |
| ZrSSe alternating | 1T | 7.484 | 2.558(2.581) | 2.701(2.722) |       |       |       |
|                   |    |       |              |              |       |       |       |
| MoS <sub>2</sub>  | 2H | 3.183 | 2.413        |              | 3.127 |       |       |
| MoSe <sub>2</sub> | 2H | 3.320 |              | 2.541        |       | 3.336 |       |
| MoSSe heterolayer | 2H | 3.250 | 2.420        | 2.535        |       |       | 3.232 |
| MoSSe alternating | 2H | 6.500 | 2.409(2.412) | 2.543(2.545) |       |       |       |
| MoSSe separating  | 2H | 6.500 | 2.409(2.419) | 2.536(2.544) | 3.095 | 3.372 |       |
|                   |    |       |              |              |       |       |       |
| WS <sub>2</sub>   | 2H | 3.182 | 2.416        |              | 3.139 |       |       |
| WSe <sub>2</sub>  | 2H | 3.316 |              | 2.545        |       | 3.354 |       |
| WSSe heterolayer  | 2H | 3.249 | 2.423        | 2.540        |       |       | 3.246 |
| WSSe alternating  | 2H | 6.498 | 2.412(2.415) | 2.548(2.551) |       |       |       |
| WSSe separating   | 2H | 6.498 | 2.412(2.422) | 2.542(2.549) | 3.107 | 3.387 |       |
